# Supplementary material
Source: ML conference proceedings conference paper supplement (https://proceedings.neurips.cc/paper_files/paper/2018/hash/6a61d423d02a1c56250dc23ae7ff12f3-Abstract.html)
Supplement: Supplementary file [file 6a61d423d02a1c56250dc23ae7ff12f3-Supplemental.zip]

## A Notation

Table 3: Nomenclature

|                          |                                                                                                                                            |
|--------------------------|--------------------------------------------------------------------------------------------------------------------------------------------|
| $n \in \{1 \dots N\}$    | number of data points $n$                                                                                                                  |
| $m \in \{1 \dots M\}$    | number of inducing variables $m$                                                                                                           |
| $\ell \in \{1 \dots L\}$ | number of output dimension of the GP $\ell$                                                                                                |
| $\mathbf{w}_n$           | the latent variable corresponding to data point $n$ , $\mathbf{w} \in \mathbb{R}^{D_{\mathbf{w}}}$                                         |
| $\mathbf{x}_n$           | $n^{\text{th}}$ input variable, $\mathbf{x} \in \mathbb{R}^{D_{\mathbf{x}}}$                                                               |
| $\mathbf{y}_n$           | $n^{\text{th}}$ output variable, $\mathbf{y} \in \mathbb{R}^{D_{\mathbf{y}}}$                                                              |
| $\mathbf{W}$             | matrix collecting all the latent variables $\mathbf{W} = \{\mathbf{w}_n\}_{n=1}^N$ , $\mathbf{W} \in \mathbb{R}^{N \times D_{\mathbf{w}}}$ |
| $\mathbf{X}$             | matrix collecting all the inputs $\mathbf{X} = \{\mathbf{x}_n\}_{n=1}^N$ , $\mathbf{X} \in \mathbb{R}^{N \times D_{\mathbf{x}}}$           |
| $\mathbf{Y}$             | matrix collecting all the observations $\mathbf{Y} = \{\mathbf{y}_n\}_{n=1}^N$ , $\mathbf{Y} \in \mathbb{R}^{N \times D_{\mathbf{y}}}$     |
| $\sigma^2$               | observation noise                                                                                                                          |
| $f_\ell$                 | function $f_\ell(\cdot)$ evaluated at certain inputs                                                                                       |
| $\mathbf{f}(\cdot)$      | collection of GPs, $\{f_\ell(\cdot)\}_{\ell=1}^L$                                                                                          |
| $k(\cdot, \cdot)$        | prior covariance function of the $d^{\text{th}}$ GP                                                                                        |
| $\mathbf{Z}$             | locations of variational pseudo-inputs                                                                                                     |
| $\mathbf{u}_\ell$        | evaluations of the $\ell^{\text{th}}$ GP at the pseudo-inputs: $\mathbf{u}_\ell = \{f_\ell(\mathbf{z}_m)\}_{m=1}^M$ .                      |
| $\mathbf{U}$             | collection: $\mathbf{U} = \{\mathbf{u}_\ell\}_{\ell=1}^L$                                                                                  |
| $\mathbf{m}_\ell$        | variational posterior mean $\mathbf{u}_\ell$                                                                                               |
| $\mathbf{S}_\ell$        | variational posterior covariance of $\mathbf{u}_\ell$                                                                                      |

## B Network Architectures

In all neural network setups we apply dropout to the output of the hidden layers. The optimal dropout rate is found using grid-search over  $\{0.2, 0.1, 0.01, 0.0\}$ . We use the Adam optimizer for optimization and perform grid-search over  $\{0.01, 0.001, 0.0001\}$  to determine the optimal learning rate. The biases are initialized to zero and the weights using the Xavier distribution [14].

**Heteroscedastic noise modeling on UCI datasets** Given the modest size of the UCI datasets we choose a relatively small encoder and decoder architecture. The encoder has layers of the following size:  $D_{\mathbf{x}} + D_{\mathbf{y}}$ , 50, 100, 50 and  $2 \times D_{\mathbf{w}}$ . The decoder layers have size  $D_{\mathbf{x}} + D_{\mathbf{w}}$ , 10, 50, 50, 10 and  $D_{\mathbf{y}}$ . For this experiment we choose a unidimensional latent variable,  $D_{\mathbf{w}} = 1$ . The targets of the UCI datasets are also 1D. We use the tanh activation function for all hidden layers and the linear activation function for the final layer.

**Density estimation on MNIST** In this experiment we follow Wu et al. [29] for the network architecture. The decoder has 5 fully connected layers of size:  $D_{\mathbf{x}} + D_{\mathbf{w}}$ , 64, 256, 256, 256, 1024 and  $D_{\mathbf{y}}$ . The tanh activation function is applied to the outputs of the hidden layers and the sigmoid function on the final one. The encoder's fully connected layers have size:  $D_{\mathbf{x}} + D_{\mathbf{y}}$ , 256, 64,  $2 \times D_{\mathbf{w}}$ . We use the tanh activation function for the encoder's hidden layers and the linear activation function for the final layer. The inputs are one-hot encoding of the labels,  $D_{\mathbf{x}} = 10$  and  $D_{\mathbf{y}} = 784$ .

## C Inference details

In section 3.2 we follow Hensman et al. [15] and use sparse GPs to approximate the full GP. We do this by introducing  $M$  inducing or pseudo-inputs  $\mathbf{z}_m \in \mathbb{R}^{D_{\mathbf{x}}+D_{\mathbf{w}}}$  and collect them in the matrix  $\mathbf{Z} = \{\mathbf{z}_m\}_{m=1}^M$ . The inducing outputs  $\mathbf{u}_\ell = f_\ell(\mathbf{Z})$  are the function  $f_\ell(\cdot)$  evaluated at the inducing inputs. Similarly, we collect the inducing outputs over all dimensions in the matrix  $\mathbf{U} = \{\mathbf{u}_\ell\}_{\ell=1}^L$ . We assume a Gaussian prior for the inducing outputs  $p(\mathbf{u}_\ell) = \mathcal{N}(\mathbf{0}, \mathbf{K})$  and define a posterior distribution of the form  $q(\mathbf{u}_\ell) = \mathcal{N}(\mathbf{m}_\ell, \mathbf{S}_\ell)$ . The sparse GP framework assumes  $\mathbf{u}_\ell$  and  $\mathbf{f}_\ell$  to be jointly Gaussian. We can now write  $f_\ell(\cdot)$  conditioned on the inducing outputs  $\mathbf{u}_\ell$  as

$$f_\ell(\cdot) | \mathbf{u}_\ell \sim \mathcal{GP}(\mathbf{k}_Z^\top(\cdot) \mathbf{K}_{ZZ}^{-1} \mathbf{u}_\ell, k(\cdot, \cdot) - \mathbf{k}_Z^\top(\cdot) \mathbf{K}_{ZZ}^{-1} \mathbf{k}_Z(\cdot)),$$

where  $[\mathbf{k}_Z(\cdot)]_m = k(\cdot, \mathbf{z}_m)$  and  $[\mathbf{K}_{ZZ}]_{mm'} = k(\mathbf{z}_m, \mathbf{z}_{m'})$ . Marginalizing with respect to  $\mathbf{u}_\ell \sim \mathcal{N}(\mathbf{m}_\ell, \mathbf{S}_\ell)$  leads to the variational posterior  $q(f_\ell(\cdot))$

$$f_\ell(\cdot) \sim \mathcal{GP}(\mathbf{k}_Z^\top(\cdot) \mathbf{K}_{ZZ}^{-1} \mathbf{m}_\ell, k(\cdot, \cdot) - \mathbf{k}_Z^\top(\cdot) \mathbf{K}_{ZZ}^{-1} (\mathbf{K}_{ZZ} - \mathbf{S}_\ell) \mathbf{K}_{ZZ}^{-1} \mathbf{k}_Z(\cdot)) =: \mathcal{GP}(\mu_\ell(\cdot), \sigma_\ell^2(\cdot)).$$

As both, the variational posterior over the GP and the likelihood, are Gaussian,  $\mathcal{L}_{\mathbf{w}_n}$  (defined in (3)) can be calculated analytically. We start by using the fact that the likelihood factorizes over the output dimension  $\mathbb{E}_{q(\mathbf{f}(\cdot))} [\log p(\mathbf{y}_n | \mathbf{f}(\cdot), \mathbf{x}_n, \mathbf{w}_n)] = \sum_\ell \mathbb{E}_{q(f_\ell(\cdot))} [\log p(\mathbf{y}_{n,\ell} | f_\ell(\cdot), \mathbf{x}_n, \mathbf{w}_n)]$ . We define a single term of the previous sum as  $\mathcal{L}_{\mathbf{w}_n}^\ell$ , which can be computed as

$$\begin{aligned} \mathcal{L}_{\mathbf{w}_n}^\ell &= \mathbb{E}_{q(f_\ell(\cdot))} \left[ -\frac{1}{2} \log(2\pi\sigma^2) - \frac{1}{2\sigma^2} (y_{n,\ell}^2 + \mathbf{f}_{n,\ell}^2 - 2y_{n,\ell}\mathbf{f}_{n,\ell}) \right] \\ &= -\frac{1}{2} \log(2\pi\sigma^2) - \frac{1}{2\sigma^2} (y_{n,\ell}^2 + (\sigma_\ell^2([\mathbf{x}_n, \mathbf{w}_n]) - \mu_\ell^2([\mathbf{x}_n, \mathbf{w}_n])) - 2y_{n,\ell}\mu_\ell([\mathbf{x}_n, \mathbf{w}_n])). \end{aligned}$$

## D Proof of optimality for latent variable posterior

In Section 3.2 we argue that using the optimal free-form distribution  $q(\mathbf{w}_n)$  leads to a tighter lower bound. The bound for the optimal and Gaussian form  $q(\mathbf{w}_n)$  are, respectively

$$\begin{aligned} \mathcal{L}_{\text{GAUSS}} &= \sum_n \left\{ \mathbb{E}_{q(\mathbf{w}_n)} \mathcal{L}_{\mathbf{w}_n} - \text{KL}[p(\mathbf{w}_n) \| p(\mathbf{w}_n)] \right\} - \sum_\ell \text{KL}[q(\mathbf{u}_\ell) \| p(\mathbf{u}_\ell)] \\ \mathcal{L}_{\text{FREE}} &= \log \mathbb{E}_{p(\mathbf{W})} \left\{ \exp \left( \sum_n \mathcal{L}_{\mathbf{w}_n} - \sum_\ell \text{KL}[q(\mathbf{u}_\ell) \| p(\mathbf{u}_\ell)] \right) \right\}. \end{aligned}$$

Starting from  $\mathcal{L}_{\text{FREE}}$  and using Jensen's inequality, we get

$$\begin{aligned} \mathcal{L}_{\text{FREE}} &= \log \mathbb{E}_{q(\mathbf{W})} \left\{ \frac{p(\mathbf{W})}{q(\mathbf{W})} \exp \left( \sum_n \mathcal{L}_{\mathbf{w}_n} - \sum_\ell \text{KL}[q(\mathbf{u}_\ell) \| p(\mathbf{u}_\ell)] \right) \right\} \\ &\geq \sum_n \left\{ \mathbb{E}_{q(\mathbf{w}_n)} \mathcal{L}_{\mathbf{w}_n} - \text{KL}[p(\mathbf{w}_n) \| p(\mathbf{w}_n)] \right\} - \sum_\ell \text{KL}[q(\mathbf{u}_\ell) \| p(\mathbf{u}_\ell)]. \end{aligned}$$

Therefore

$$\log p(\mathbf{Y} | \mathbf{X}) \geq \mathcal{L}_{\text{FREE}} \geq \mathcal{L}_{\text{GAUSS}}.$$

## E Density estimation on MNIST: complete table

Table 4: Log-likelihoods of the CVAE and GP-CDE model.  $N$  is the number of training images per class. Higher test log-likelihood is better.

|     | CVAE             |        |                      |        |                  | GP-CDE           |       |                      |       |                  |
|-----|------------------|--------|----------------------|--------|------------------|------------------|-------|----------------------|-------|------------------|
|     | Fixed $\sigma^2$ |        | $\sigma^2$ optimized |        |                  | Fixed $\sigma^2$ |       | $\sigma^2$ optimized |       |                  |
| $N$ | Test             | Train  | Test                 | Train  | $\sigma_{opt}^2$ | Test             | Train | Test                 | Train | $\sigma_{opt}^2$ |
| 2   | -129.72          | 180.97 | -1296.63             | 956.39 | 0.01378          | 161.9            | 242.2 | 74.01                | 130.4 | 0.0303           |
| 4   | -60.03           | 178.22 | -759.18              | 956.26 | 0.01364          | 195.2            | 254.2 | 86.59                | 160.3 | 0.0310           |
| 8   | -31.37           | 176.76 | -616.474             | 949.83 | 0.01358          | 234.1            | 269.8 | 124.6                | 168.2 | 0.0312           |
| 16  | -15.50           | 173.34 | -497.15              | 924.11 | 0.01382          | 290.1            | 305.8 | 141.5                | 163.5 | 0.0303           |
| 32  | -1.04            | 161.10 | -382.20              | 800.03 | 0.01577          | 452.7            | 443   | 131.9                | 131.7 | 0.0322           |
| 64  | 18.03            | 130.78 | -227.06              | 530.40 | 0.02348          | 545.2            | 515.7 | 141.2                | 114   | 0.0342           |
| 128 | 41.94            | 97.23  | 76.15                | 399.78 | 0.02959          | 508.3            | 447   | 93.6                 | 89.1  | 0.0364           |
| 256 | 52.17            | 76.18  | 218.08               | 325.72 | 0.03272          | 606.2            | 545   | 108.1                | 105.4 | 0.0378           |
| 512 | 54.48            | 65.30  | 244.88               | 286.38 | 0.03407          | 606.7            | 512   | 124.2                | 120.7 | 0.0388           |

## F Additional Figures

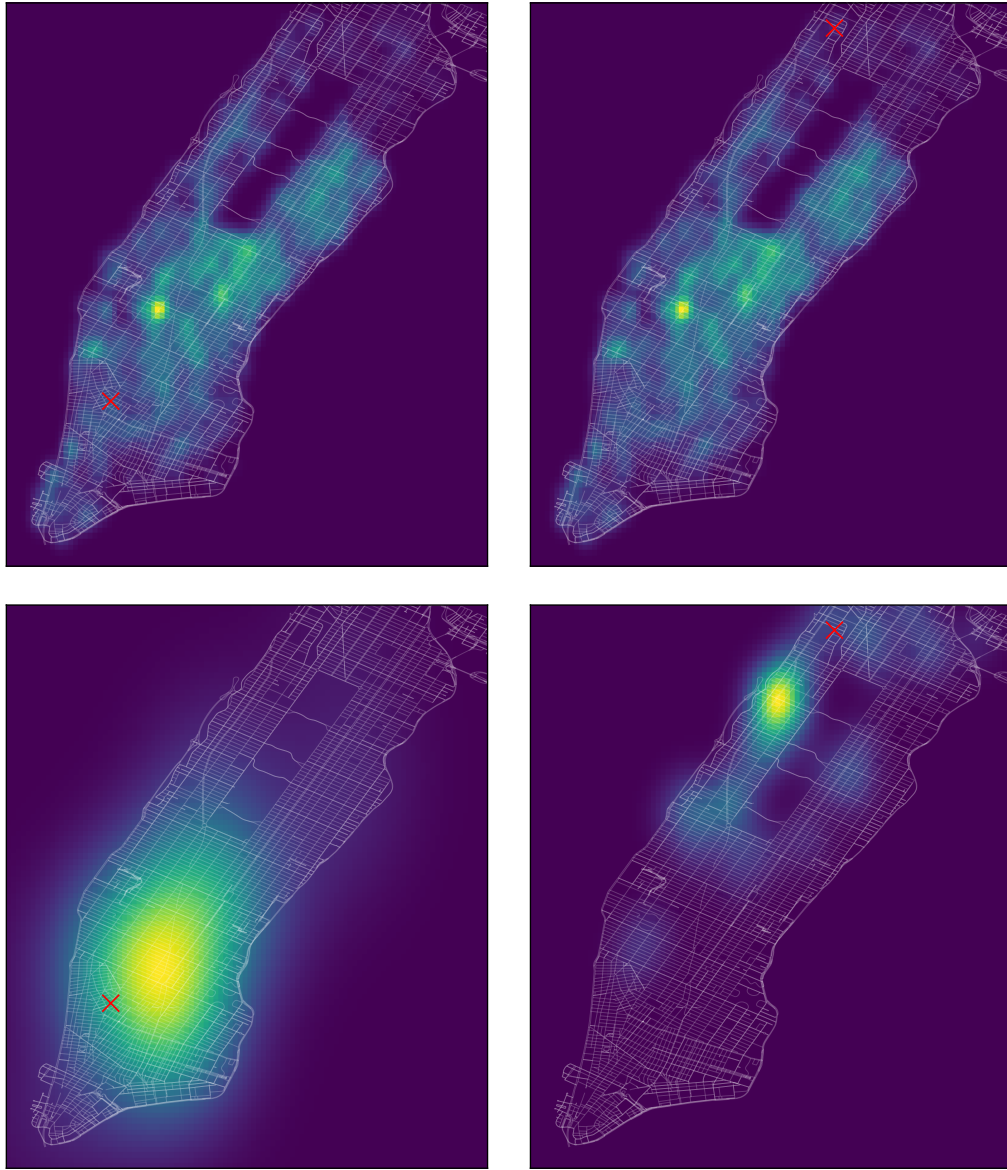

Figure 5: Kernel density estimation models, unconditional (top row), and conditioned on the 50 nearest neighbors.

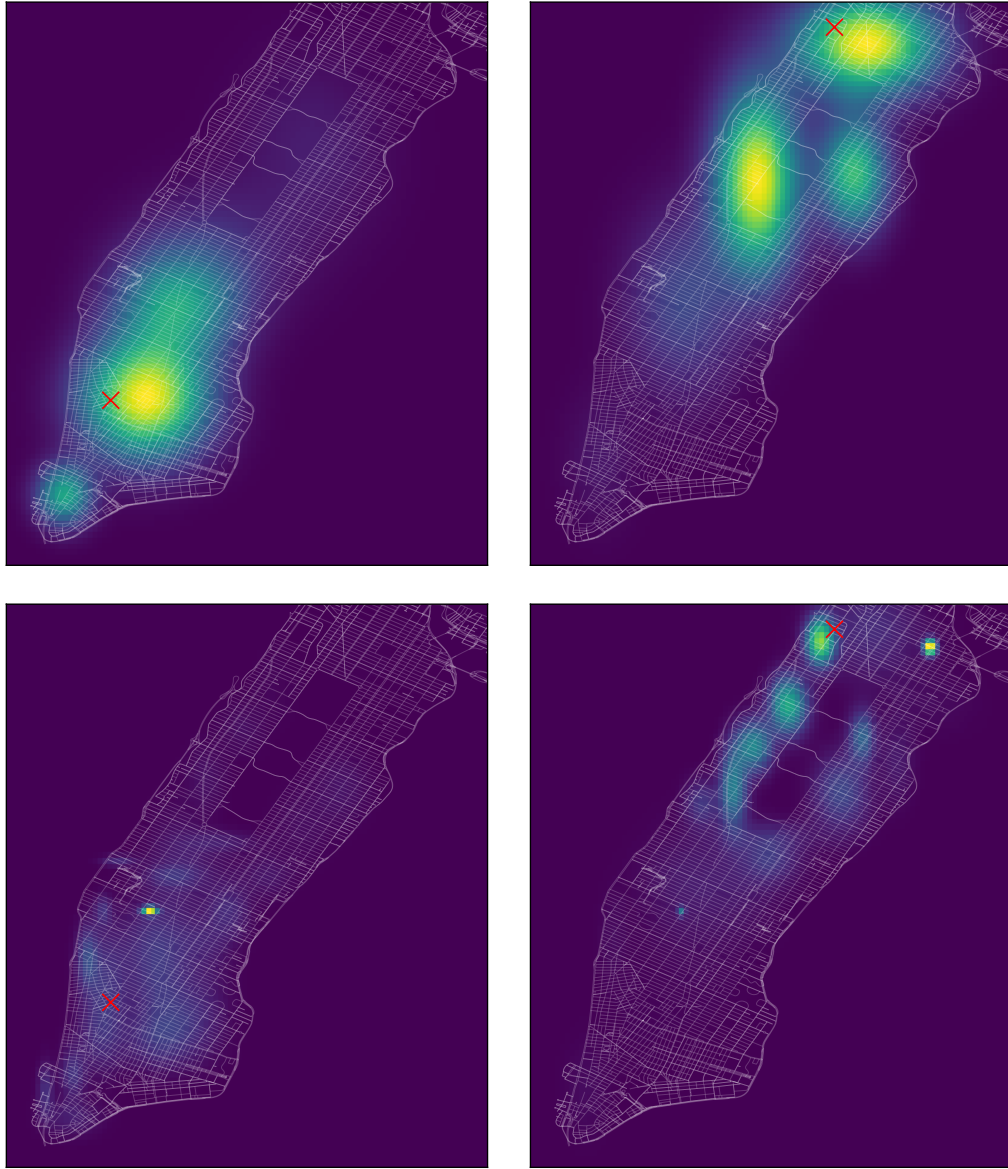

Figure 6: MDN. Top row: 5 components. Bottom row: 50 components

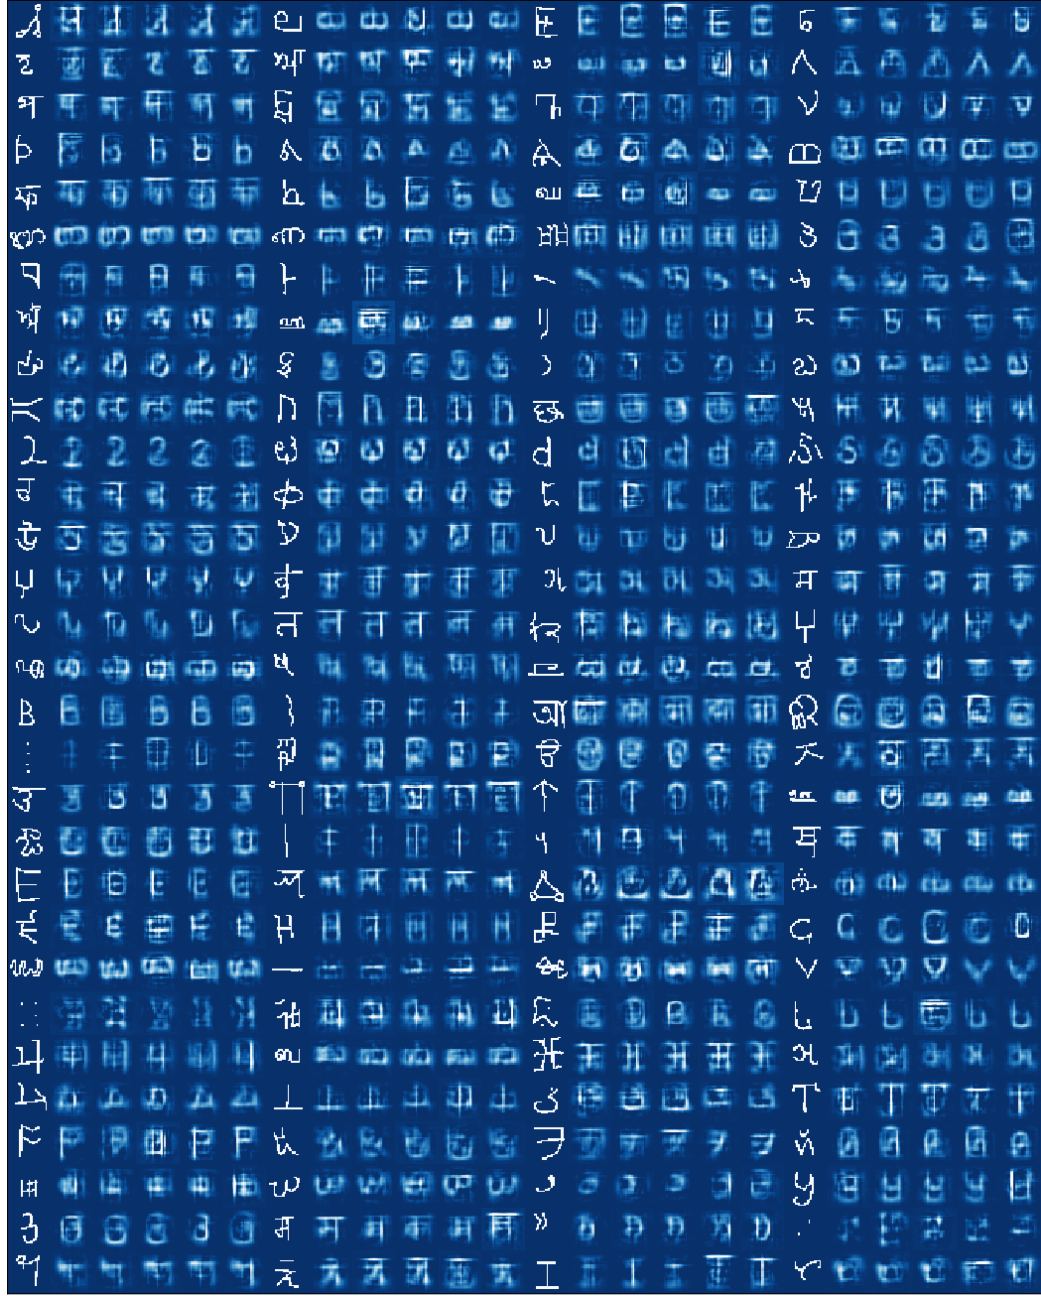

Figure 7: Five samples from the posterior conditioned on 120 labels randomly chosen from the **training** set. The model saw 20 examples of each image. An example image from the data is shown to the left of each set



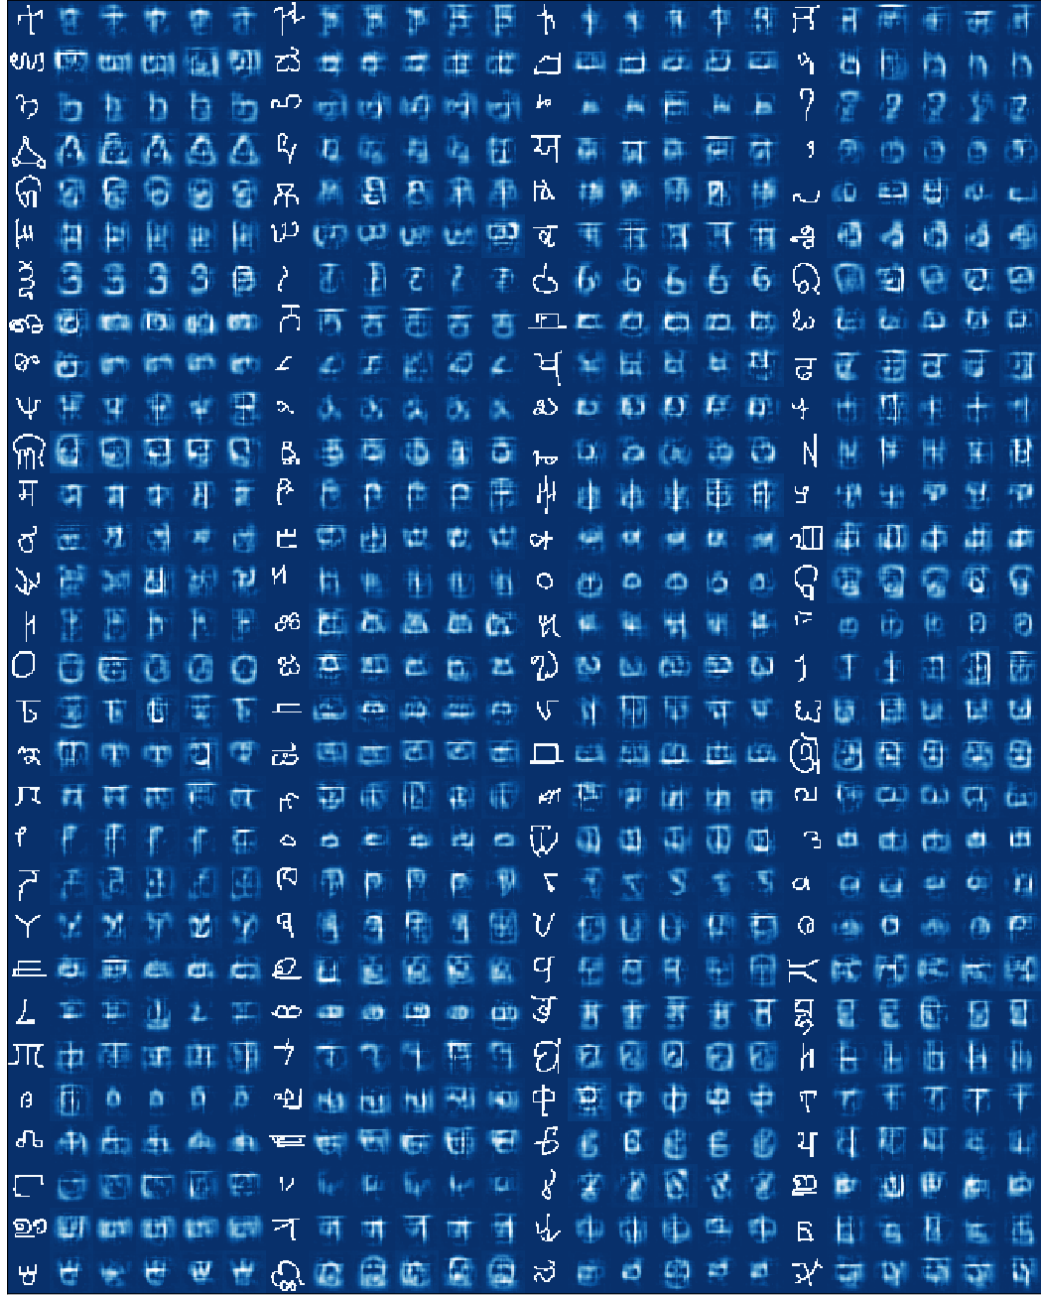

Figure 8: Five samples from the posterior conditioned on 120 labels randomly chosen from the **test** set. The model saw 4 examples of each image. An example image from the data is shown to the left of each set

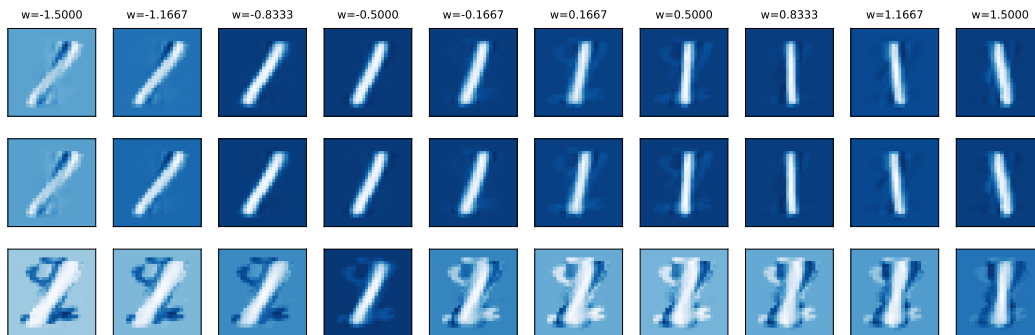

Figure 9: The mean of the GP mapping conditioned on the 1D latent variable, for a dataset of 100 ‘1’s. Top: the analytic solution of Titsias and Lawrence [26]. Middle: our natural gradient approach, with a step size of 0.1. Bottom: using the Adam optimizer to optimize the variational parameters  $\mathbf{m}$  and  $\mathbf{S}$ . We see that the ordinary gradient approach is prone to getting ‘stuck’ in poor local optima, due to the difficulty of optimization.

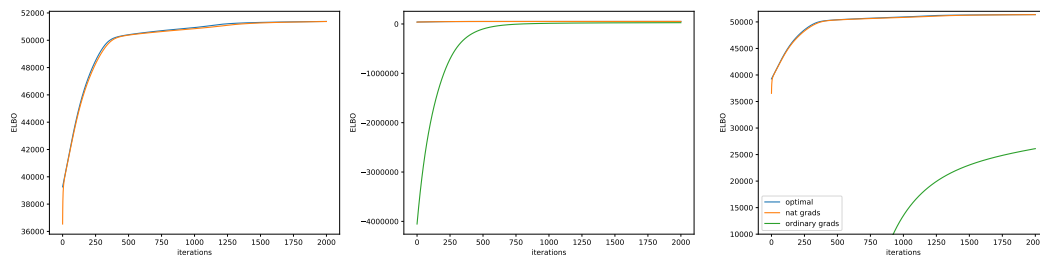

Figure 10: The training objective for the dataset of 100 ‘1’s. The three plots show the same three curves with different ranges on the y-axis to highlight the similarities and differences. We can see that natural gradients provide a striking improvement. See Fig. 9 for the samples at the end of training
